# Supplementary material
Source: Springer Nature journal article supplement (https://www.springermedizin.de/resource/supplementary/12958_2012_990_MOESM2_ESM.pdf/9566516)

**A****1****2****3**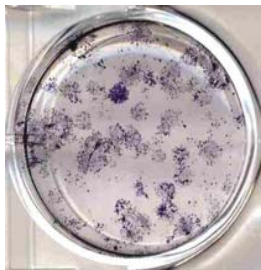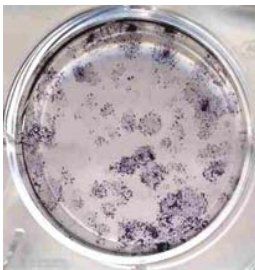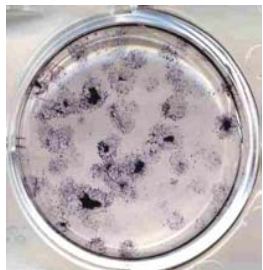**TR4<sup>+/+</sup>**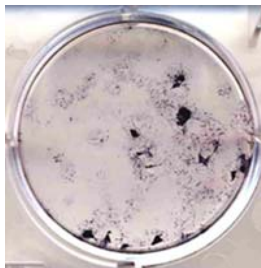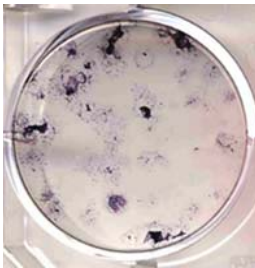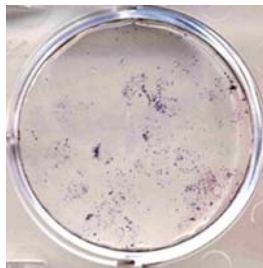**TR4<sup>-/-</sup>****1****2****3**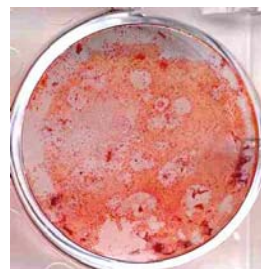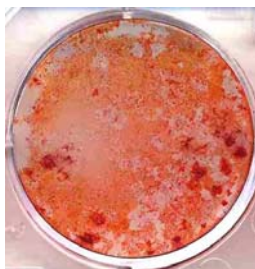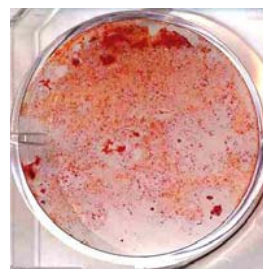**TR4<sup>+/+</sup>**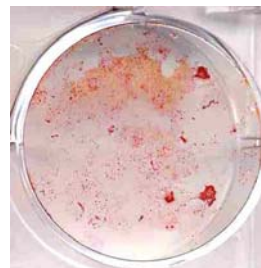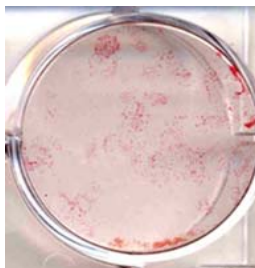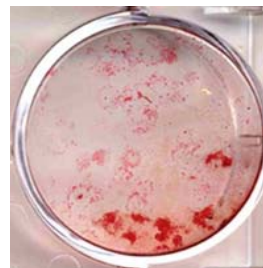**TR4<sup>-/-</sup>**

Supplement: MOESM2 [file 9566516]
